# Supplementary material
Source: Springer Nature journal article supplement (https://www.springermedizin.de/resource/supplementary/12885_2011_3165_MOESM7_ESM.pdf/9464224)

**a**

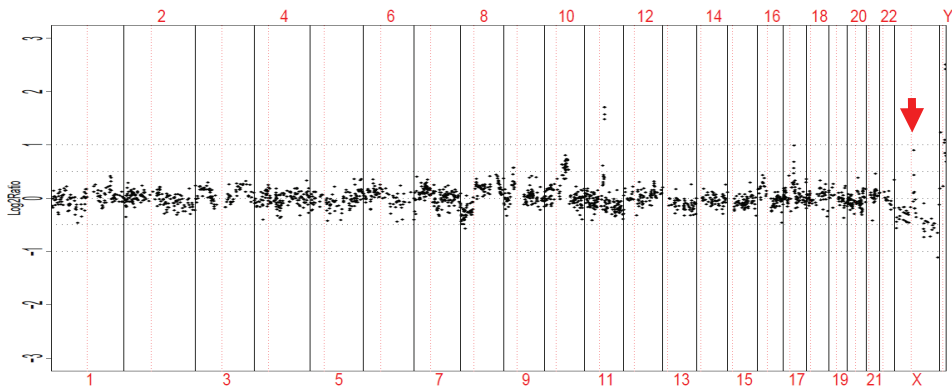

**20 CTCs**

**r = 0.78**

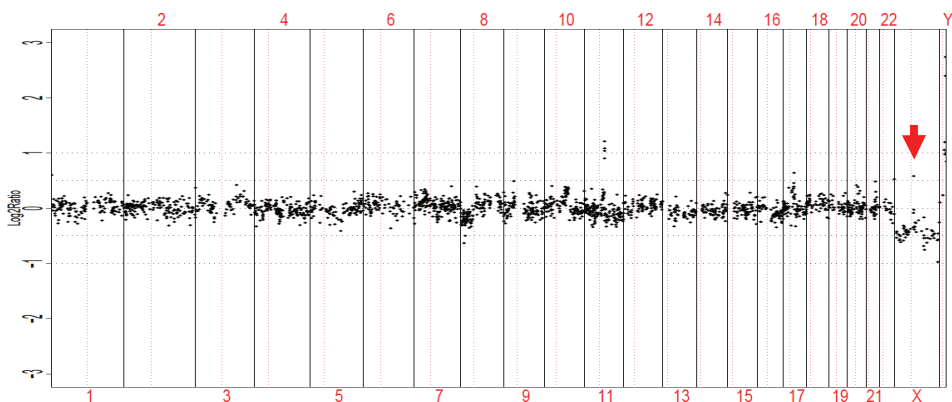

**20 CTCs**

**b**

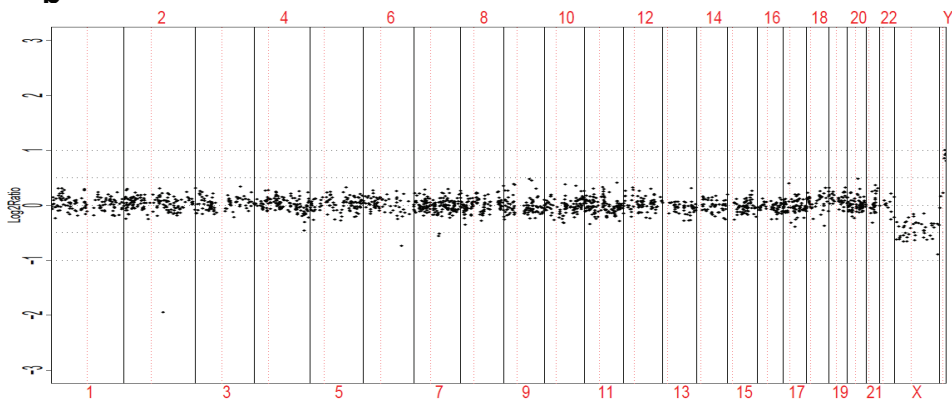

**100 CD45+**

Supplement: MOESM7 [file 9464224]
